# Supplementary material
Source: publisher figshare collection journal article supplement (https://brill.figshare.com/ndownloader/files/31257775)
Supplement: Supplementary file 1 [file 31257775]

APPENDIX C

Table C1. Height, stem circumference and collection data for *Moquiniastrum polymorphum* and *Zanthoxylum rhoifolium*.

| *Moquiniastrum polymorphum* | | | | | *Zanthoxylum rhoifolium* | | | |
| --- | --- | --- | --- | --- | --- | --- | --- | --- |
|  | Trees | BOTU/ BOTUw | Height (m) | Stem circumference (cm) | Trees | BOTU/ BOTUw | Height (m) | Stem circumference (cm) |
| Wet | MB 81 | BOTUw 2491 | 4 | 30 | MB 86 | BOTUw 2511 | 7 | 37 |
| MB 82 | BOTUw 2492 | 3.5 | 38 | MB 87 | BOTUw 2512 | 10 | 78 |
| MB 83 | BOTUw 2493 | 5 | 29.5 | MB 88 | BOTUw 2513 | 6.5 | 39 |
| MB 84 | BOTUw 2494 | 5.5 | 33 | MB 89 | BOTUw 2514 | 7 | 37 |
| MB 85 | BOTUw 2495 | 3.5 | 32 | MB 90 | BOTUw 2515 | 8 | 75 |
| Mean | |  | 4.3 | 32.5 |  |  | 7.7 | 53.2 |
| Standard deviation | |  | 0.9 | 3.4 |  |  | 1.4 | 21.3 |
|  |  |  |  |  |  |  |  |  |
| Dry1 | MB 53 | BOTU 32561/ BOTUw 2476 | 6 | 44 | MB 51 | BOTU 32355/ BOTUw 2496 | 4 | 52.5 |
| MB 54 | BOTU 32556/ BOTUw 2477 | 4 | 45.5 | MB 52 | BOTUw 2497 | 4.5 | 39 |
| MB 57 | BOTU 32557/ BOTUw 2478 | 6 | 45 | MB 55 | BOTUw 2498 | 4 | 35 |
| MB 58 | BOTU 32558/ BOTUw 2479 | 5 | 47 | MB 56 | BOTUw 2499 | 4 | 31.5 |
| MB 59 | BOTU 32559/ BOTUw 2480 | 7 | 60 | MB 60 | BOTUw 2500 | 5 | 32.5 |
| Mean |  |  | 5.6 | 48.3 |  |  | 4.3 | 38.1 |
| Standard deviation | |  | 1.1 | 6.6 |  |  | 0.4 | 8.5 |
|  |  |  |  |  |  |  |  |  |
| Dry2 | MB 66 | BOTU 30332/ BOTUw 2486 | 5 | 54.5 | MB 91 | BOTUw 2506 | 6 | 46 |
| MB 67 | BOTU 30331/ BOTUw 2487 | 4.5 | 49.5 | MB 92 | BOTUw 2507 | 5 | 52 |
| MB 68 | BOTU 30330/ BOTUw 2488 | 6 | 45.5 | MB 93 | BOTUw 2508 | 6 | 47 |
| MB 69 | BOTU 30333/ BOTUw 2489 | 5 | 49 | MB 94 | BOTUw 2509 | 5.5 | 30 |
| MB 70 | BOTU 30329/ BOTUw 2490 | 4 | 51.5 | MB 95 | BOTUw 2510 | 6 | 33 |
| Mean |  |  | 4.9 | 50 |  |  | 5.7 | 41.6 |
| Standard deviation | |  | 0.7 | 3.3 |  |  | 0.4 | 9.5 |
|  |  |  |  |  |  |  |  |  |
| Dry3 | MB 71 | BOTUw 2481 | 6 | 51.5 | MB 75 | BOTUw 2501 | 6 | 39 |
| MB 72 | BOTUw 2482 | 6.5 | 61 | MB 77 | BOTUw 2502 | 7 | 37 |
| MB 73 | BOTUw 2483 | 6 | 60.5 | MB 78 | BOTUw 2503 | 5 | 38 |
| MB 74 | BOTUw 2484 | 7 | 60 | MB 79 | BOTUw 2504 | 6 | 45 |
| MB 76 | BOTUw 2485 | 8 | 52 | MB 80 | BOTUw 2505 | 5 | 34 |
| Mean |  |  | 6.7 | 57 |  |  | 5.8 | 38.6 |
| Standard deviation | |  | 0.8 | 4.8 |  |  | 0.8 | 4.0 |

Botu, "Irina Delanova Gemtchujnicov" vouchers; BOTUw, “Profa. Dra. Maria Aparecida Mourão Brasil” wood collection.
